# Supplementary material for: Dosimetric comparison and evaluation of different convergence modes in nasopharyngeal carcinoma using VMAT treatment deliveries
Source: PeerJ. 2024 Dec 23;12:e18773. doi: 10.7717/peerj.18773 (PMC11670755; doi:10.7717/peerj.18773)
Supplement: Supplemental Information 1 [file peerj-12-18773-s001.xlsx]

## Sheet: 1
DVH Metrics Table
Course ID	PlanSetup ID	Structure ID	Volume (cc)	DVH Objective	Goal	Must	Priority	OFF	ON	Extended	OFF	ON	Extended
		PTV70		CI							0.610657	0.636871	0.677522
		PTV70		HI							0.11191	0.103892	0.103986
		PTV66		HI							0.113838	0.107096	0.10828
		PTV60		HI							0.234077	0.223434	0.226874
		PTV54		CI							0.802007	0.816453	0.824614
		PTV54		HI							0.434125	0.417839	0.419172
test-CM	OFF	PTV70	144.6	D95%[cGy]				6999.9 cGy	7000.0 cGy	6999.9 cGy	6999.9	7000.0	6999.9
test-CM	OFF	PTV70	144.6	D98%[cGy]				6778.9 cGy	6784.0 cGy	6777.9 cGy	6778.9	6784.0	6777.9
test-CM	OFF	PTV70	144.6	D50%[cGy]				7341.6 cGy	7318.2 cGy	7307.7 cGy	7341.6	7318.2	7307.7
test-CM	OFF	PTV70	144.6	D2%[cGy]				7600.5 cGy	7544.3 cGy	7537.8 cGy	7600.5	7544.3	7537.8
test-CM	OFF	PTV70	144.6	V7000cGy[cc]				137.4 cc	137.4 cc	137.4 cc	137.4	137.4	137.4
test-CM	OFF	PTV66	72.1	D95%[cGy]				6680.0 cGy	6670.5 cGy	6639.9 cGy	6680.0	6670.5	6639.9
test-CM	OFF	PTV66	72.1	D98%[cGy]				6512.5 cGy	6503.5 cGy	6470.1 cGy	6512.5	6503.5	6470.1
test-CM	OFF	PTV66	72.1	D50%[cGy]				7068.8 cGy	7034.8 cGy	6981.0 cGy	7068.8	7034.8	6981.0
test-CM	OFF	PTV66	72.1	D2%[cGy]				7317.2 cGy	7256.9 cGy	7226.0 cGy	7317.2	7256.9	7226.0
test-CM	OFF	PTV66	72.1	V6600cGy[cc]				69.8 cc	69.7 cc	69.2 cc	69.8	69.7	69.2
test-CM	OFF	PTV60	246.1	D95%[cGy]				6184.5 cGy	6168.7 cGy	6161.5 cGy	6184.5	6168.7	6161.5
test-CM	OFF	PTV60	246.1	D98%[cGy]				5889.9 cGy	5919.6 cGy	5885.8 cGy	5889.9	5919.6	5885.8
test-CM	OFF	PTV60	246.1	D50%[cGy]				7195.5 cGy	7169.9 cGy	7163.9 cGy	7195.5	7169.9	7163.9
test-CM	OFF	PTV60	246.1	D2%[cGy]				7574.2 cGy	7521.6 cGy	7511.1 cGy	7574.2	7521.6	7511.1
test-CM	OFF	PTV60	246.1	V6000cGy[cc]				239.5 cc	239.6 cc	239.2 cc	239.5	239.6	239.2
test-CM	OFF	PTV54	767.1	D95%[cGy]				5164.4 cGy	5212.2 cGy	5209.3 cGy	5164.4	5212.2	5209.3
test-CM	OFF	PTV54	767.1	D98%[cGy]				4754.6 cGy	4832.0 cGy	4823.0 cGy	4754.6	4832.0	4823.0
test-CM	OFF	PTV54	767.1	D50%[cGy]				6335.5 cGy	6297.4 cGy	6266.4 cGy	6335.5	6297.4	6266.4
test-CM	OFF	PTV54	767.1	D2%[cGy]				7505.0 cGy	7463.3 cGy	7449.7 cGy	7505.0	7463.3	7449.7
test-CM	OFF	PTV54	767.1	V5400cGy[cc]				698.3 cc	701.8 cc	700.8 cc	698.3	701.8	700.8
test-CM	OFF	Body	7297.1	V7000cGy[cc]				213.8 cc	205 cc	192.7 cc	213.8	205	192.7
test-CM	OFF	Body	7297.1	V6600cGy[cc]				321.8 cc	314.8 cc	309.4 cc	321.8	314.8	309.4
test-CM	OFF	Body	7297.1	V6000cGy[cc]				521.5 cc	494.5 cc	483.6 cc	521.5	494.5	483.6
test-CM	OFF	Body	7297.1	V5400cGy[cc]				792.6 cc	786.4 cc	776.4 cc	792.6	786.4	776.4
test-CM	OFF	BrainStem	23.8	Max[cGy]				7002.6 cGy	7010.1 cGy	6977.2 cGy	7002.6	7010.1	6977.2
test-CM	OFF	BrainStem	23.8	Mean[cGy]				3610.4 cGy	3586.3 cGy	3497.2 cGy	3610.4	3586.3	3497.2
test-CM	OFF	SpinalCord	28.6	Max[cGy]				4596.1 cGy	4522.2 cGy	4569.2 cGy	4596.1	4522.2	4569.2
test-CM	OFF	SpinalCord	28.6	Mean[cGy]				2636.5 cGy	2583.8 cGy	2617.4 cGy	2636.5	2583.8	2617.4
test-CM	OFF	OpticNerve_L	0.5	Max[cGy]				6535.4 cGy	6502.4 cGy	6517.9 cGy	6535.4	6502.4	6517.9
test-CM	OFF	OpticNerve_R	0.3	Max[cGy]				6660.8 cGy	6570.1 cGy	6517.6 cGy	6660.8	6570.1	6517.6
test-CM	OFF	OpticChiasm	0.6	Max[cGy]				6501.7 cGy	6451.2 cGy	6480.3 cGy	6501.7	6451.2	6480.3
test-CM	OFF	Lens_L	0.2	Max[cGy]				504.7 cGy	473.7 cGy	457.5 cGy	504.7	473.7	457.5
test-CM	OFF	Lens_R	0.2	Max[cGy]				536.4 cGy	486.1 cGy	466.7 cGy	536.4	486.1	466.7
test-CM	OFF	Eye_L	8.6	Mean[cGy]				1203.3 cGy	971.1 cGy	1053.9 cGy	1203.3	971.1	1053.9
test-CM	OFF	Eye_R	7.9	Mean[cGy]				1194.3 cGy	1208.0 cGy	1130.8 cGy	1194.3	1208.0	1130.8
test-CM	OFF	Parotid_L	21.1	Mean[cGy]				2761.0 cGy	2807.5 cGy	2744.0 cGy	2761.0	2807.5	2744.0
test-CM	OFF	Parotid_L	21.1	V3000cGy[%]				0.301	0.316	0.3	30.1	31.6	30
test-CM	OFF	Parotid_R	13.4	Mean[cGy]				2825.3 cGy	2796.6 cGy	2793.9 cGy	2825.3	2796.6	2793.9
test-CM	OFF	Parotid_R	13.4	V3000cGy[%]				0.291	0.295	0.308	29.1	29.5	30.8
test-CM	OFF	Mandible	65.3	D2%[cGy]				6302.1 cGy	6305.3 cGy	6202.2 cGy	6302.1	6305.3	6202.2
test-CM	OFF	Larynx	47.7	Mean[cGy]				3604.7 cGy	3491.8 cGy	3498.2 cGy	3604.7	3491.8	3498.2
test-CM	OFF	OralCavity	112.7	Mean[cGy]				3337.9 cGy	3249.2 cGy	3193.2 cGy	3337.9	3249.2	3193.2
test-CM	OFF	Pituitary	0.3	Max[cGy]				7442.3 cGy	7301.0 cGy	7317.7 cGy	7442.3	7301.0	7317.7
test-CM	OFF	TMJ_L	2.2	Max[cGy]				5930.3 cGy	5937.0 cGy	5980.5 cGy	5930.3	5937.0	5980.5
test-CM	OFF	TMJ_R	2.4	Max[cGy]				5351.7 cGy	5527.7 cGy	5444.3 cGy	5351.7	5527.7	5444.3
test-CM	OFF	MiddleEar_L	1.9	Mean[cGy]				3360.8 cGy	3281.6 cGy	3285.7 cGy	3360.8	3281.6	3285.7
test-CM	OFF	MiddleEar_R	1.3	Mean[cGy]				3116.3 cGy	3143.4 cGy	3110.7 cGy	3116.3	3143.4	3110.7

## Sheet: 2
DVH Metrics Table
Course ID	PlanSetup ID	Structure ID	Volume (cc)	DVH Objective	Goal	Must	Priority	OFF	ON	Extended	OFF	ON	Extended
		PTV70		CI							0.716612	0.745045	0.752233
		PTV70		HI							0.0771598	0.0740879	0.0713585
		PTV66		HI							0.114455	0.108233	0.108071
		PTV60		HI							0.21642	0.214301	0.212228
		PTV54		CI							0.845403	0.851845	0.857075
		PTV54		HI							0.389813	0.379809	0.373094
test_CM	OFF	PTV70	54.8	D95%[cGy]				7037.3 cGy	7033.8 cGy	7034.3 cGy	7037.3	7033.8	7034.3
test_CM	OFF	PTV70	54.8	D98%[cGy]				6964.2 cGy	6956.8 cGy	6970.2 cGy	6964.2	6956.8	6970.2
test_CM	OFF	PTV70	54.8	D50%[cGy]				7278.4 cGy	7252.2 cGy	7242.3 cGy	7278.4	7252.2	7242.3
test_CM	OFF	PTV70	54.8	D2%[cGy]				7525.8 cGy	7494.1 cGy	7487.0 cGy	7525.8	7494.1	7487.0
test_CM	OFF	PTV70	54.8	V7000cGy[cc]				53.1 cc	53 cc	53.1 cc	53.1	53	53.1
test_CM	OFF	PTV66	35.8	D95%[cGy]				6602.3 cGy	6607.3 cGy	6607.9 cGy	6602.3	6607.3	6607.9
test_CM	OFF	PTV66	35.8	D98%[cGy]				6381.2 cGy	6384.5 cGy	6378.0 cGy	6381.2	6384.5	6378.0
test_CM	OFF	PTV66	35.8	D50%[cGy]				6891.8 cGy	6876.8 cGy	6874.2 cGy	6891.8	6876.8	6874.2
test_CM	OFF	PTV66	35.8	D2%[cGy]				7170.0 cGy	7128.8 cGy	7120.9 cGy	7170.0	7128.8	7120.9
test_CM	OFF	PTV66	35.8	V6600cGy[cc]				34.1 cc	34.1 cc	34.1 cc	34.1	34.1	34.1
test_CM	OFF	PTV60	138.8	D95%[cGy]				6102.3 cGy	6097.4 cGy	6099.5 cGy	6102.3	6097.4	6099.5
test_CM	OFF	PTV60	138.8	D98%[cGy]				5991.0 cGy	5983.0 cGy	5990.0 cGy	5991.0	5983.0	5990.0
test_CM	OFF	PTV60	138.8	D50%[cGy]				6894.0 cGy	6884.7 cGy	6876.1 cGy	6894.0	6884.7	6876.1
test_CM	OFF	PTV60	138.8	D2%[cGy]				7483.0 cGy	7458.4 cGy	7449.3 cGy	7483.0	7458.4	7449.3
test_CM	OFF	PTV60	138.8	V6000cGy[cc]				135.8 cc	135.6 cc	135.7 cc	135.8	135.6	135.7
test_CM	OFF	PTV54	748.1	D95%[cGy]				5303.2 cGy	5335.4 cGy	5345.6 cGy	5303.2	5335.4	5345.6
test_CM	OFF	PTV54	748.1	D98%[cGy]				5031.6 cGy	5078.4 cGy	5105.2 cGy	5031.6	5078.4	5105.2
test_CM	OFF	PTV54	748.1	D50%[cGy]				5966.2 cGy	5949.3 cGy	5942.2 cGy	5966.2	5949.3	5942.2
test_CM	OFF	PTV54	748.1	D2%[cGy]				7357.3 cGy	7338.0 cGy	7322.2 cGy	7357.3	7338.0	7322.2
test_CM	OFF	PTV54	748.1	V5400cGy[cc]				692.2 cc	698.4 cc	699.9 cc	692.2	698.4	699.9
test_CM	OFF	Body	12917.5	V7000cGy[cc]				71.8 cc	68.8 cc	68.4 cc	71.8	68.8	68.4
test_CM	OFF	Body	12917.5	V6600cGy[cc]				154 cc	151.2 cc	150.4 cc	154	151.2	150.4
test_CM	OFF	Body	12917.5	V6000cGy[cc]				357.8 cc	343.8 cc	335.8 cc	357.8	343.8	335.8
test_CM	OFF	Body	12917.5	V5400cGy[cc]				757.6 cc	765.4 cc	764 cc	757.6	765.4	764
test_CM	OFF	BrainStem	29.1	Max[cGy]				4944.4 cGy	4943.1 cGy	4903.9 cGy	4944.4	4943.1	4903.9
test_CM	OFF	BrainStem	29.1	Mean[cGy]				2409.7 cGy	2451.0 cGy	2389.5 cGy	2409.7	2451.0	2389.5
test_CM	OFF	SpinalCord	35.9	Max[cGy]				4140.0 cGy	3989.7 cGy	3967.6 cGy	4140.0	3989.7	3967.6
test_CM	OFF	SpinalCord	35.9	Mean[cGy]				2301.8 cGy	2239.3 cGy	2186.6 cGy	2301.8	2239.3	2186.6
test_CM	OFF	OpticNerve_L	0.4	Max[cGy]				3233.5 cGy	3433.4 cGy	3305.4 cGy	3233.5	3433.4	3305.4
test_CM	OFF	OpticNerve_R	0.4	Max[cGy]				3472.8 cGy	3442.4 cGy	3282.6 cGy	3472.8	3442.4	3282.6
test_CM	OFF	OpticChiasm	0.2	Max[cGy]				1982.4 cGy	1943.9 cGy	2014.8 cGy	1982.4	1943.9	2014.8
test_CM	OFF	Lens_L	0.2	Max[cGy]				330.9 cGy	352.1 cGy	313.5 cGy	330.9	352.1	313.5
test_CM	OFF	Lens_R	0.2	Max[cGy]				337.8 cGy	348.9 cGy	356.2 cGy	337.8	348.9	356.2
test_CM	OFF	Eye_L	9.3	Mean[cGy]				629.9 cGy	645.7 cGy	649.4 cGy	629.9	645.7	649.4
test_CM	OFF	Eye_R	9.4	Mean[cGy]				617.0 cGy	635.5 cGy	585.5 cGy	617.0	635.5	585.5
test_CM	OFF	Parotid_L	29.5	Mean[cGy]				2670.7 cGy	2692.9 cGy	2738.6 cGy	2670.7	2692.9	2738.6
test_CM	OFF	Parotid_L	29.5	V3000cGy[%]				0.295	0.287	0.314	29.5	28.7	31.4
test_CM	OFF	Parotid_R	24.7	Mean[cGy]				2115.0 cGy	2111.4 cGy	2127.1 cGy	2115.0	2111.4	2127.1
test_CM	OFF	Parotid_R	24.7	V3000cGy[%]				0.182	0.181	0.183	18.2	18.1	18.3
test_CM	OFF	Mandible	88.1	D2%[cGy]				5301.7 cGy	5294.3 cGy	5326.4 cGy	5301.7	5294.3	5326.4
test_CM	OFF	Larynx	67.3	Mean[cGy]				3229.3 cGy	3207.8 cGy	3228.2 cGy	3229.3	3207.8	3228.2
test_CM	OFF	OralCavity	119.9	Mean[cGy]				2887.2 cGy	2864.8 cGy	2770.5 cGy	2887.2	2864.8	2770.5
test_CM	OFF	Pituitary	0.7	Max[cGy]				3744.5 cGy	3743.2 cGy	3722.6 cGy	3744.5	3743.2	3722.6
test_CM	OFF	TMJ_L	2.1	Max[cGy]				4954.7 cGy	4882.6 cGy	4775.0 cGy	4954.7	4882.6	4775.0
test_CM	OFF	TMJ_R	2.3	Max[cGy]				5271.6 cGy	5042.0 cGy	5149.5 cGy	5271.6	5042.0	5149.5
test_CM	OFF	MiddleEar_L	1.5	Mean[cGy]				2757.8 cGy	2694.3 cGy	2661.7 cGy	2757.8	2694.3	2661.7
test_CM	OFF	MiddleEar_R	1.6	Mean[cGy]				2625.9 cGy	2570.7 cGy	2558.5 cGy	2625.9	2570.7	2558.5

## Sheet: 3
DVH Metrics Table
Course ID	PlanSetup ID	Structure ID	Volume (cc)	DVH Objective	Goal	Must	Priority	OFF	ON	Extended	OFF	ON	Extended
		PTV70		CI							0.686284	0.778755	0.773747
		PTV70		HI							0.0682428	0.0649562	0.0614469
		PTV66		HI							0.0664474	0.0614446	0.0695729
		PTV60		HI							0.200723	0.198605	0.195623
		PTV54		CI							0.843358	0.848465	0.857031
		PTV54		HI							0.355415	0.351541	0.350733
test_CM	OFF	PTV70	26.6	D95%[cGy]				7013.3 cGy	7000.0 cGy	6999.9 cGy	7013.3	7000.0	6999.9
test_CM	OFF	PTV70	26.6	D98%[cGy]				6961.5 cGy	6950.4 cGy	6952.6 cGy	6961.5	6950.4	6952.6
test_CM	OFF	PTV70	26.6	D50%[cGy]				7271.1 cGy	7241.8 cGy	7229.0 cGy	7271.1	7241.8	7229.0
test_CM	OFF	PTV70	26.6	D2%[cGy]				7457.7 cGy	7420.8 cGy	7396.8 cGy	7457.7	7420.8	7396.8
test_CM	OFF	PTV70	26.6	V7000cGy[cc]				25.6 cc	25.3 cc	25.3 cc	25.6	25.3	25.3
test_CM	OFF	PTV66	48.8	D95%[cGy]				6660.2 cGy	6630.6 cGy	6605.5 cGy	6660.2	6630.6	6605.5
test_CM	OFF	PTV66	48.8	D98%[cGy]				6602.9 cGy	6578.0 cGy	6546.0 cGy	6602.9	6578.0	6546.0
test_CM	OFF	PTV66	48.8	D50%[cGy]				6870.1 cGy	6815.9 cGy	6801.5 cGy	6870.1	6815.9	6801.5
test_CM	OFF	PTV66	48.8	D2%[cGy]				7059.4 cGy	6996.8 cGy	7019.2 cGy	7059.4	6996.8	7019.2
test_CM	OFF	PTV66	48.8	V6600cGy[cc]				47.9 cc	47.3 cc	46.5 cc	47.9	47.3	46.5
test_CM	OFF	PTV60	83.9	D95%[cGy]				6130.5 cGy	6107.0 cGy	6096.7 cGy	6130.5	6107.0	6096.7
test_CM	OFF	PTV60	83.9	D98%[cGy]				6075.1 cGy	6055.2 cGy	6047.5 cGy	6075.1	6055.2	6047.5
test_CM	OFF	PTV60	83.9	D50%[cGy]				6747.1 cGy	6726.4 cGy	6703.7 cGy	6747.1	6726.4	6703.7
test_CM	OFF	PTV60	83.9	D2%[cGy]				7429.4 cGy	7391.1 cGy	7358.9 cGy	7429.4	7391.1	7358.9
test_CM	OFF	PTV60	83.9	V6000cGy[cc]				83.6 cc	83.4 cc	83.3 cc	83.6	83.4	83.3
test_CM	OFF	PTV54	803.4	D95%[cGy]				5302.8 cGy	5299.7 cGy	5302.1 cGy	5302.8	5299.7	5302.1
test_CM	OFF	PTV54	803.4	D98%[cGy]				5150.0 cGy	5168.1 cGy	5178.8 cGy	5150.0	5168.1	5178.8
test_CM	OFF	PTV54	803.4	D50%[cGy]				5852.6 cGy	5797.9 cGy	5760.5 cGy	5852.6	5797.9	5760.5
test_CM	OFF	PTV54	803.4	D2%[cGy]				7230.1 cGy	7206.3 cGy	7199.2 cGy	7230.1	7206.3	7199.2
test_CM	OFF	PTV54	803.4	V5400cGy[cc]				734.9 cc	730.2 cc	727.8 cc	734.9	730.2	727.8
test_CM	OFF	Body	13828.4	V7000cGy[cc]				35.9 cc	30.9 cc	31.1 cc	35.9	30.9	31.1
test_CM	OFF	Body	13828.4	V6600cGy[cc]				119.4 cc	111.8 cc	107.9 cc	119.4	111.8	107.9
test_CM	OFF	Body	13828.4	V6000cGy[cc]				284.9 cc	253.8 cc	237.6 cc	284.9	253.8	237.6
test_CM	OFF	Body	13828.4	V5400cGy[cc]				797.1 cc	782.2 cc	769.3 cc	797.1	782.2	769.3
test_CM	OFF	BrainStem	29.8	Max[cGy]				4924.4 cGy	4933.0 cGy	4924.2 cGy	4924.4	4933.0	4924.2
test_CM	OFF	BrainStem	29.8	Mean[cGy]				2692.1 cGy	2593.4 cGy	2618.3 cGy	2692.1	2593.4	2618.3
test_CM	OFF	SpinalCord	21.5	Max[cGy]				3484.4 cGy	3433.3 cGy	3199.8 cGy	3484.4	3433.3	3199.8
test_CM	OFF	SpinalCord	21.5	Mean[cGy]				2544.9 cGy	2469.8 cGy	2287.7 cGy	2544.9	2469.8	2287.7
test_CM	OFF	OpticNerve_L	0.2	Max[cGy]				3958.3 cGy	3901.8 cGy	3883.9 cGy	3958.3	3901.8	3883.9
test_CM	OFF	OpticNerve_R	0.1	Max[cGy]				3528.4 cGy	3427.5 cGy	3494.1 cGy	3528.4	3427.5	3494.1
test_CM	OFF	OpticChiasm	0.4	Max[cGy]				4651.1 cGy	4636.6 cGy	4612.1 cGy	4651.1	4636.6	4612.1
test_CM	OFF	Lens_L	0.1	Max[cGy]				268.3 cGy	260.4 cGy	262.7 cGy	268.3	260.4	262.7
test_CM	OFF	Lens_R	0.1	Max[cGy]				298.4 cGy	301.4 cGy	300.6 cGy	298.4	301.4	300.6
test_CM	OFF	Eye_L	7.8	Mean[cGy]				353.2 cGy	341.1 cGy	352.9 cGy	353.2	341.1	352.9
test_CM	OFF	Eye_R	7.6	Mean[cGy]				479.8 cGy	450.6 cGy	467.5 cGy	479.8	450.6	467.5
test_CM	OFF	Parotid_L	61.6	Mean[cGy]				2331.0 cGy	2288.0 cGy	2257.3 cGy	2331.0	2288.0	2257.3
test_CM	OFF	Parotid_L	61.6	V3000cGy[%]				0.261	0.232	0.23	26.1	23.2	23
test_CM	OFF	Parotid_R	61.5	Mean[cGy]				2321.4 cGy	2242.3 cGy	2219.7 cGy	2321.4	2242.3	2219.7
test_CM	OFF	Parotid_R	61.5	V3000cGy[%]				0.238	0.222	0.201	23.8	22.2	20.1
test_CM	OFF	Mandible	80	D2%[cGy]				5605.7 cGy	5601.4 cGy	5580.4 cGy	5605.7	5601.4	5580.4
test_CM	OFF	Larynx	89.9	Mean[cGy]				3949.2 cGy	3828.6 cGy	3708.2 cGy	3949.2	3828.6	3708.2
test_CM	OFF	OralCavity	110.3	Mean[cGy]				3342.1 cGy	3236.8 cGy	3135.8 cGy	3342.1	3236.8	3135.8
test_CM	OFF	Pituitary	0.2	Max[cGy]				5847.0 cGy	5774.2 cGy	5776.2 cGy	5847.0	5774.2	5776.2
test_CM	OFF	TMJ_L	1.4	Max[cGy]				2927.1 cGy	2828.6 cGy	3036.6 cGy	2927.1	2828.6	3036.6
test_CM	OFF	TMJ_R	3.1	Max[cGy]				4566.1 cGy	4816.7 cGy	4704.8 cGy	4566.1	4816.7	4704.8
											#VALUE!	#VALUE!	#VALUE!
											#VALUE!	#VALUE!	#VALUE!

## Sheet: 4
DVH Metrics Table
Course ID	PlanSetup ID	Structure ID	Volume (cc)	DVH Objective	Goal	Must	Priority	OFF	ON	Extended	OFF	ON	Extended
		PTV70		CI							0.556048	0.620247	0.627256
		PTV70		HI							0.0850266	0.0778682	0.0726225
		PTV66		HI							0.100202	0.0869824	0.0943655
		PTV60		HI							0.242846	0.235068	0.229234
		PTV54		CI							0.795872	0.816535	0.829011
		PTV54		HI							0.455539	0.428651	0.407902
test_CM	OFF	PTV70	34.3	D95%[cGy]				7183.6 cGy	7121.7 cGy	7118.9 cGy	7183.6	7121.7	7118.9
test_CM	OFF	PTV70	34.3	D98%[cGy]				7075.5 cGy	7031.7 cGy	7041.5 cGy	7075.5	7031.7	7041.5
test_CM	OFF	PTV70	34.3	D50%[cGy]				7495.3 cGy	7406.1 cGy	7376.5 cGy	7495.3	7406.1	7376.5
test_CM	OFF	PTV70	34.3	D2%[cGy]				7712.8 cGy	7608.4 cGy	7577.2 cGy	7712.8	7608.4	7577.2
test_CM	OFF	PTV70	34.3	V7000cGy[cc]				33.8 cc	33.8 cc	33.8 cc	33.8	33.8	33.8
test_CM	OFF	PTV66	12.3	D95%[cGy]				6821.6 cGy	6775.8 cGy	6790.0 cGy	6821.6	6775.8	6790.0
test_CM	OFF	PTV66	12.3	D98%[cGy]				6692.5 cGy	6703.4 cGy	6676.4 cGy	6692.5	6703.4	6676.4
test_CM	OFF	PTV66	12.3	D50%[cGy]				7135.6 cGy	7068.1 cGy	7083.1 cGy	7135.6	7068.1	7083.1
test_CM	OFF	PTV66	12.3	D2%[cGy]				7407.5 cGy	7318.2 cGy	7344.8 cGy	7407.5	7318.2	7344.8
test_CM	OFF	PTV66	12.3	V6600cGy[cc]				12.1 cc	12.2 cc	12.1 cc	12.1	12.2	12.1
test_CM	OFF	PTV60	105	D95%[cGy]				6173.5 cGy	6107.0 cGy	6100.2 cGy	6173.5	6107.0	6100.2
test_CM	OFF	PTV60	105	D98%[cGy]				5995.0 cGy	5965.9 cGy	5978.5 cGy	5995.0	5965.9	5978.5
test_CM	OFF	PTV60	105	D50%[cGy]				6929.9 cGy	6855.9 cGy	6822.3 cGy	6929.9	6855.9	6822.3
test_CM	OFF	PTV60	105	D2%[cGy]				7677.9 cGy	7577.5 cGy	7542.4 cGy	7677.9	7577.5	7542.4
test_CM	OFF	PTV60	105	V6000cGy[cc]				102.9 cc	102.5 cc	102.6 cc	102.9	102.5	102.6
test_CM	OFF	PTV54	503.4	D95%[cGy]				5266.0 cGy	5310.6 cGy	5360.6 cGy	5266.0	5310.6	5360.6
test_CM	OFF	PTV54	503.4	D98%[cGy]				4864.3 cGy	4941.1 cGy	5026.5 cGy	4864.3	4941.1	5026.5
test_CM	OFF	PTV54	503.4	D50%[cGy]				5967.0 cGy	5936.3 cGy	5943.1 cGy	5967.0	5936.3	5943.1
test_CM	OFF	PTV54	503.4	D2%[cGy]				7582.5 cGy	7485.7 cGy	7450.7 cGy	7582.5	7485.7	7450.7
test_CM	OFF	PTV54	503.4	V5400cGy[cc]				464.7 cc	468.9 cc	474.1 cc	464.7	468.9	474.1
test_CM	OFF	Body	10632.2	V7000cGy[cc]				59.9 cc	53.7 cc	53.1 cc	59.9	53.7	53.1
test_CM	OFF	Body	10632.2	V6600cGy[cc]				96.7 cc	88.4 cc	85.9 cc	96.7	88.4	85.9
test_CM	OFF	Body	10632.2	V6000cGy[cc]				244.1 cc	218.9 cc	218.1 cc	244.1	218.9	218.1
test_CM	OFF	Body	10632.2	V5400cGy[cc]				539 cc	534.9 cc	538.6 cc	539	534.9	538.6
test_CM	OFF	BrainStem	24.6	Max[cGy]				4141.3 cGy	4051.7 cGy	4068.5 cGy	4141.3	4051.7	4068.5
test_CM	OFF	BrainStem	24.6	Mean[cGy]				2403.5 cGy	2330.2 cGy	2311.0 cGy	2403.5	2330.2	2311.0
test_CM	OFF	SpinalCord	23.8	Max[cGy]				3471.2 cGy	3297.1 cGy	3229.6 cGy	3471.2	3297.1	3229.6
test_CM	OFF	SpinalCord	23.8	Mean[cGy]				1883.5 cGy	1650.6 cGy	1681.5 cGy	1883.5	1650.6	1681.5
test_CM	OFF	OpticNerve_L	0.3	Max[cGy]				5070.2 cGy	4945.3 cGy	4952.7 cGy	5070.2	4945.3	4952.7
test_CM	OFF	OpticNerve_R	0.3	Max[cGy]				5011.7 cGy	4933.9 cGy	4902.5 cGy	5011.7	4933.9	4902.5
test_CM	OFF	OpticChiasm	0.6	Max[cGy]				5017.9 cGy	4961.1 cGy	4978.6 cGy	5017.9	4961.1	4978.6
test_CM	OFF	Lens_L	0.2	Max[cGy]				331.5 cGy	297.8 cGy	314.4 cGy	331.5	297.8	314.4
test_CM	OFF	Lens_R	0.2	Max[cGy]				345.7 cGy	308.7 cGy	304.6 cGy	345.7	308.7	304.6
test_CM	OFF	Eye_L	8.3	Mean[cGy]				456.5 cGy	468.1 cGy	424.7 cGy	456.5	468.1	424.7
test_CM	OFF	Eye_R	7.7	Mean[cGy]				504.3 cGy	438.6 cGy	420.3 cGy	504.3	438.6	420.3
test_CM	OFF	Parotid_L	22.7	Mean[cGy]				3156.8 cGy	3014.1 cGy	2939.9 cGy	3156.8	3014.1	2939.9
test_CM	OFF	Parotid_L	22.7	V3000cGy[%]				0.4	0.368	0.352	40	36.8	35.2
test_CM	OFF	Parotid_R	17.7	Mean[cGy]				3191.0 cGy	3049.8 cGy	2957.2 cGy	3191.0	3049.8	2957.2
test_CM	OFF	Parotid_R	17.7	V3000cGy[%]				0.41	0.377	0.355	41	37.7	35.5
test_CM	OFF	Mandible	59.7	D2%[cGy]				4848.4 cGy	4788.9 cGy	4760.7 cGy	4848.4	4788.9	4760.7
test_CM	OFF	Larynx	34.2	Mean[cGy]				3566.8 cGy	3321.4 cGy	3301.5 cGy	3566.8	3321.4	3301.5
test_CM	OFF	OralCavity	132.8	Mean[cGy]				2594.4 cGy	2550.0 cGy	2625.2 cGy	2594.4	2550.0	2625.2
test_CM	OFF	Pituitary	0.4	Max[cGy]				5759.5 cGy	5748.7 cGy	5702.3 cGy	5759.5	5748.7	5702.3
test_CM	OFF	TMJ_L	1.6	Max[cGy]				4032.2 cGy	3700.8 cGy	3917.3 cGy	4032.2	3700.8	3917.3
test_CM	OFF	TMJ_R	2	Max[cGy]				3956.8 cGy	3861.0 cGy	3931.0 cGy	3956.8	3861.0	3931.0
test_CM	OFF	MiddleEar_L	1.7	Mean[cGy]				2321.6 cGy	2284.6 cGy	2283.3 cGy	2321.6	2284.6	2283.3
test_CM	OFF	MiddleEar_R	1.4	Mean[cGy]				2537.6 cGy	2494.5 cGy	2498.3 cGy	2537.6	2494.5	2498.3

## Sheet: 5
DVH Metrics Table
Course ID	PlanSetup ID	Structure ID	Volume (cc)	DVH Objective	Goal	Must	Priority	OFF	ON	Extended	OFF	ON	Extended
		PTV70		CI							0.793419	0.833438	0.837109
		PTV70		HI							0.0693938	0.0683992	0.0673635
		PTV66		HI							0.0808653	0.0722016	0.0744063
		PTV60		HI							0.213624	0.214418	0.217579
		PTV54		CI							0.860223	0.867498	0.874354
		PTV54		HI							0.362442	0.355927	0.354314
test_CM	OFF	PTV70	42.1	D95%[cGy]				6999.9 cGy	6999.9 cGy	7000.0 cGy	6999.9	6999.9	7000.0
test_CM	OFF	PTV70	42.1	D98%[cGy]				6939.2 cGy	6938.8 cGy	6943.1 cGy	6939.2	6938.8	6943.1
test_CM	OFF	PTV70	42.1	D50%[cGy]				7270.1 cGy	7257.4 cGy	7242.8 cGy	7270.1	7257.4	7242.8
test_CM	OFF	PTV70	42.1	D2%[cGy]				7443.7 cGy	7435.2 cGy	7431.0 cGy	7443.7	7435.2	7431.0
test_CM	OFF	PTV70	42.1	V7000cGy[cc]				40 cc	40 cc	40 cc	40	40	40
test_CM	OFF	PTV66	29.5	D95%[cGy]				6586.3 cGy	6593.4 cGy	6591.7 cGy	6586.3	6593.4	6591.7
test_CM	OFF	PTV66	29.5	D98%[cGy]				6515.9 cGy	6527.4 cGy	6525.0 cGy	6515.9	6527.4	6525.0
test_CM	OFF	PTV66	29.5	D50%[cGy]				6837.3 cGy	6828.1 cGy	6822.0 cGy	6837.3	6828.1	6822.0
test_CM	OFF	PTV66	29.5	D2%[cGy]				7068.8 cGy	7020.4 cGy	7032.6 cGy	7068.8	7020.4	7032.6
test_CM	OFF	PTV66	29.5	V6600cGy[cc]				27.7 cc	27.9 cc	27.8 cc	27.7	27.9	27.8
test_CM	OFF	PTV60	120.2	D95%[cGy]				6059.6 cGy	6038.8 cGy	6002.2 cGy	6059.6	6038.8	6002.2
test_CM	OFF	PTV60	120.2	D98%[cGy]				5972.4 cGy	5963.5 cGy	5935.3 cGy	5972.4	5963.5	5935.3
test_CM	OFF	PTV60	120.2	D50%[cGy]				6731.0 cGy	6700.0 cGy	6673.9 cGy	6731.0	6700.0	6673.9
test_CM	OFF	PTV60	120.2	D2%[cGy]				7410.3 cGy	7400.1 cGy	7387.4 cGy	7410.3	7400.1	7387.4
test_CM	OFF	PTV60	120.2	V6000cGy[cc]				117 cc	116.4 cc	114.4 cc	117	116.4	114.4
test_CM	OFF	PTV54	606.3	D95%[cGy]				5343.0 cGy	5360.3 cGy	5362.9 cGy	5343.0	5360.3	5362.9
test_CM	OFF	PTV54	606.3	D98%[cGy]				5190.7 cGy	5223.3 cGy	5224.4 cGy	5190.7	5223.3	5224.4
test_CM	OFF	PTV54	606.3	D50%[cGy]				5904.4 cGy	5879.3 cGy	5860.9 cGy	5904.4	5879.3	5860.9
test_CM	OFF	PTV54	606.3	D2%[cGy]				7330.7 cGy	7315.9 cGy	7301.0 cGy	7330.7	7315.9	7301.0
test_CM	OFF	PTV54	606.3	V5400cGy[cc]				564.6 cc	567.4 cc	568.1 cc	564.6	567.4	568.1
test_CM	OFF	Body	11308.6	V7000cGy[cc]				47.9 cc	45.6 cc	45.4 cc	47.9	45.6	45.4
test_CM	OFF	Body	11308.6	V6600cGy[cc]				109.2 cc	105.8 cc	103.5 cc	109.2	105.8	103.5
test_CM	OFF	Body	11308.6	V6000cGy[cc]				254.1 cc	239 cc	228 cc	254.1	239	228
test_CM	OFF	Body	11308.6	V5400cGy[cc]				611.2 cc	612.1 cc	608.8 cc	611.2	612.1	608.8
test_CM	OFF	BrainStem	23	Max[cGy]				4649.5 cGy	4613.2 cGy	4637.4 cGy	4649.5	4613.2	4637.4
test_CM	OFF	BrainStem	23	Mean[cGy]				2758.7 cGy	2692.7 cGy	2614.0 cGy	2758.7	2692.7	2614.0
test_CM	OFF	SpinalCord	22.2	Max[cGy]				3727.2 cGy	3621.1 cGy	3623.6 cGy	3727.2	3621.1	3623.6
test_CM	OFF	SpinalCord	22.2	Mean[cGy]				2098.5 cGy	2145.4 cGy	2047.8 cGy	2098.5	2145.4	2047.8
test_CM	OFF	OpticNerve_L	0.4	Max[cGy]				2556.9 cGy	2431.1 cGy	2418.5 cGy	2556.9	2431.1	2418.5
test_CM	OFF	OpticNerve_R	0.4	Max[cGy]				3852.7 cGy	3804.5 cGy	3763.6 cGy	3852.7	3804.5	3763.6
test_CM	OFF	OpticChiasm	0.1	Max[cGy]				3177.9 cGy	3112.3 cGy	2980.2 cGy	3177.9	3112.3	2980.2
test_CM	OFF	Lens_L	0.2	Max[cGy]				186.3 cGy	176.6 cGy	178.9 cGy	186.3	176.6	178.9
test_CM	OFF	Lens_R	0.2	Max[cGy]				244.0 cGy	259.0 cGy	260.2 cGy	244.0	259.0	260.2
test_CM	OFF	Eye_L	9	Mean[cGy]				213.5 cGy	202.3 cGy	202.3 cGy	213.5	202.3	202.3
test_CM	OFF	Eye_R	9.1	Mean[cGy]				376.5 cGy	422.5 cGy	416.8 cGy	376.5	422.5	416.8
test_CM	OFF	Parotid_L	47.4	Mean[cGy]				2267.4 cGy	2228.6 cGy	2215.0 cGy	2267.4	2228.6	2215.0
test_CM	OFF	Parotid_L	47.4	V3000cGy[%]				0.252	0.251	0.246	25.2	25.1	24.6
test_CM	OFF	Parotid_R	42.1	Mean[cGy]				2085.0 cGy	2021.5 cGy	1970.5 cGy	2085.0	2021.5	1970.5
test_CM	OFF	Parotid_R	42.1	V3000cGy[%]				0.21	0.21	0.198	21	21	19.8
test_CM	OFF	Mandible	62.6	D2%[cGy]				5018.5 cGy	4861.7 cGy	4902.5 cGy	5018.5	4861.7	4902.5
test_CM	OFF	Larynx	38.6	Mean[cGy]				3657.4 cGy	3654.0 cGy	3634.2 cGy	3657.4	3654.0	3634.2
test_CM	OFF	OralCavity	124.6	Mean[cGy]				2982.0 cGy	2899.2 cGy	2897.8 cGy	2982.0	2899.2	2897.8
test_CM	OFF	Pituitary	0.4	Max[cGy]				5058.4 cGy	5046.9 cGy	4920.6 cGy	5058.4	5046.9	4920.6
test_CM	OFF	TMJ_L	2	Max[cGy]				4847.2 cGy	4931.4 cGy	4817.7 cGy	4847.2	4931.4	4817.7
test_CM	OFF	TMJ_R	1.8	Max[cGy]				5429.6 cGy	5483.0 cGy	5505.0 cGy	5429.6	5483.0	5505.0
test_CM	OFF	MiddleEar_L	1.1	Mean[cGy]				3376.1 cGy	3376.7 cGy	3378.5 cGy	3376.1	3376.7	3378.5
test_CM	OFF	MiddleEar_R	1.7	Mean[cGy]				3393.8 cGy	3387.5 cGy	3322.1 cGy	3393.8	3387.5	3322.1

## Sheet: 6
DVH Metrics Table
Course ID	PlanSetup ID	Structure ID	Volume (cc)	DVH Objective	Goal	Must	Priority	OFF	ON	Extended	OFF	ON	Extended
		PTV70		CI							0.684526	0.763182	0.796579
		PTV70		HI							0.0693903	0.0653102	0.0641876
		PTV66		HI							0.107476	0.0898301	0.102863
		PTV60		HI							0.260059	0.246046	0.239961
		PTV54		CI							0.838632	0.84395	0.853028
		PTV54		HI							0.402466	0.397745	0.396866
test_CM	OFF	PTV70	52.3	D95%[cGy]				7044.5 cGy	7042.3 cGy	7035.1 cGy	7044.5	7042.3	7035.1
test_CM	OFF	PTV70	52.3	D98%[cGy]				6964.2 cGy	6964.8 cGy	6969.4 cGy	6964.2	6964.8	6969.4
test_CM	OFF	PTV70	52.3	D50%[cGy]				7264.7 cGy	7259.2 cGy	7236.6 cGy	7264.7	7259.2	7236.6
test_CM	OFF	PTV70	52.3	D2%[cGy]				7468.3 cGy	7438.9 cGy	7433.9 cGy	7468.3	7438.9	7433.9
test_CM	OFF	PTV70	52.3	V7000cGy[cc]				50.7 cc	50.7 cc	50.7 cc	50.7	50.7	50.7
test_CM	OFF	PTV66	51.2	D95%[cGy]				6581.9 cGy	6572.7 cGy	6532.7 cGy	6581.9	6572.7	6532.7
test_CM	OFF	PTV66	51.2	D98%[cGy]				6458.5 cGy	6471.0 cGy	6365.8 cGy	6458.5	6471.0	6365.8
test_CM	OFF	PTV66	51.2	D50%[cGy]				6856.4 cGy	6832.9 cGy	6793.5 cGy	6856.4	6832.9	6793.5
test_CM	OFF	PTV66	51.2	D2%[cGy]				7195.4 cGy	7084.8 cGy	7064.6 cGy	7195.4	7084.8	7064.6
test_CM	OFF	PTV66	51.2	V6600cGy[cc]				48.1 cc	47.7 cc	46.5 cc	48.1	47.7	46.5
test_CM	OFF	PTV60	137	D95%[cGy]				5972.8 cGy	5986.3 cGy	5994.3 cGy	5972.8	5986.3	5994.3
test_CM	OFF	PTV60	137	D98%[cGy]				5655.9 cGy	5723.7 cGy	5764.9 cGy	5655.9	5723.7	5764.9
test_CM	OFF	PTV60	137	D50%[cGy]				6856.9 cGy	6847.1 cGy	6828.2 cGy	6856.9	6847.1	6828.2
test_CM	OFF	PTV60	137	D2%[cGy]				7439.1 cGy	7408.4 cGy	7403.4 cGy	7439.1	7408.4	7403.4
test_CM	OFF	PTV60	137	V6000cGy[cc]				129.3 cc	129.7 cc	129.9 cc	129.3	129.7	129.9
test_CM	OFF	PTV54	876.3	D95%[cGy]				5287.7 cGy	5294.8 cGy	5295.1 cGy	5287.7	5294.8	5295.1
test_CM	OFF	PTV54	876.3	D98%[cGy]				4960.4 cGy	4981.6 cGy	4979.2 cGy	4960.4	4981.6	4979.2
test_CM	OFF	PTV54	876.3	D50%[cGy]				5864.6 cGy	5844.7 cGy	5819.6 cGy	5864.6	5844.7	5819.6
test_CM	OFF	PTV54	876.3	D2%[cGy]				7320.7 cGy	7306.3 cGy	7288.8 cGy	7320.7	7306.3	7288.8
test_CM	OFF	PTV54	876.3	V5400cGy[cc]				807.6 cc	808.1 cc	806.2 cc	807.6	808.1	806.2
test_CM	OFF	Body	13494.9	V7000cGy[cc]				71.8 cc	64.4 cc	61.7 cc	71.8	64.4	61.7
test_CM	OFF	Body	13494.9	V6600cGy[cc]				148.2 cc	145 cc	139.4 cc	148.2	145	139.4
test_CM	OFF	Body	13494.9	V6000cGy[cc]				320.2 cc	306.1 cc	285.5 cc	320.2	306.1	285.5
test_CM	OFF	Body	13494.9	V5400cGy[cc]				887.5 cc	883 cc	869.5 cc	887.5	883	869.5
test_CM	OFF	BrainStem	30.7	Max[cGy]				5546.9 cGy	5892.1 cGy	5875.8 cGy	5546.9	5892.1	5875.8
test_CM	OFF	BrainStem	30.7	Mean[cGy]				2628.8 cGy	2566.2 cGy	2509.1 cGy	2628.8	2566.2	2509.1
test_CM	OFF	SpinalCord	27.6	Max[cGy]				3940.9 cGy	3906.7 cGy	3858.3 cGy	3940.9	3906.7	3858.3
test_CM	OFF	SpinalCord	27.6	Mean[cGy]				2162.3 cGy	2108.4 cGy	1989.8 cGy	2162.3	2108.4	1989.8
test_CM	OFF	Lens_L	0.2	Max[cGy]				270.7 cGy	270.0 cGy	284.8 cGy	270.7	270.0	284.8
test_CM	OFF	Lens_R	0.2	Max[cGy]				290.0 cGy	295.2 cGy	291.6 cGy	290.0	295.2	291.6
test_CM	OFF	Eye_L	8.2	Mean[cGy]				382.8 cGy	392.9 cGy	408.7 cGy	382.8	392.9	408.7
test_CM	OFF	Eye_R	7.4	Mean[cGy]				435.3 cGy	417.3 cGy	423.4 cGy	435.3	417.3	423.4
test_CM	OFF	Parotid_L	35.6	Mean[cGy]				2502.5 cGy	2446.2 cGy	2431.9 cGy	2502.5	2446.2	2431.9
test_CM	OFF	Parotid_L	35.6	V3000cGy[%]				0.227	0.228	0.22	0.	0.	0
test_CM	OFF	Parotid_R	33.2	Mean[cGy]				2935.0 cGy	2839.0 cGy	2783.3 cGy	2935.0	2839.0	2783.3
test_CM	OFF	Parotid_R	33.2	V3000cGy[%]				0.339	0.333	0.319	0.	0.	0.
test_CM	OFF	Larynx	64.8	Mean[cGy]				3193.1 cGy	3139.0 cGy	3131.8 cGy	#VALUE!	#VALUE!	#VALUE!
test_CM	OFF	Pituitary	0.2	Max[cGy]				6490.9 cGy	6454.6 cGy	6512.9 cGy	6490.9	6454.6	6512.9
test_CM	OFF	MiddleEar_L	4	Mean[cGy]				3085.8 cGy	3005.6 cGy	2973.1 cGy	#VALUE!	#VALUE!	#VALUE!
test_CM	OFF	MiddleEar_R	3.1	Mean[cGy]				2951.3 cGy	2943.5 cGy	2896.2 cGy	2951.3	2943.5	2896.2
											#VALUE!	#VALUE!	#VALUE!
											#VALUE!	#VALUE!	#VALUE!
											#VALUE!	#VALUE!	#VALUE!
											#VALUE!	#VALUE!	#VALUE!
											#VALUE!	#VALUE!	#VALUE!
											#VALUE!	#VALUE!	#VALUE!
											#VALUE!	#VALUE!	#VALUE!

## Sheet: 7
DVH Metrics Table
Course ID	PlanSetup ID	Structure ID	Volume (cc)	DVH Objective	Goal	Must	Priority	OFF	ON	Extended	OFF	ON	Extended
		PTV70		CI							0.550751	0.541144	0.573995
		PTV70		HI							0.0720637	0.0694561	0.0668685
		PTV66		HI							0.0999021	0.0937746	0.0911084
		PTV60		HI							0.231319	0.218687	0.219501
		PTV54		CI							0.860781	0.863976	0.870744
		PTV54		HI							0.354819	0.343343	0.342964
test_CM	OFF	PTV70	33.8	D95%[cGy]				7046.7 cGy	7048.8 cGy	7064.0 cGy	7046.7	7048.8	7064.0
test_CM	OFF	PTV70	33.8	D98%[cGy]				6983.8 cGy	6997.5 cGy	7017.0 cGy	6983.8	6997.5	7017.0
test_CM	OFF	PTV70	33.8	D50%[cGy]				7299.1 cGy	7246.3 cGy	7268.0 cGy	7299.1	7246.3	7268.0
test_CM	OFF	PTV70	33.8	D2%[cGy]				7509.8 cGy	7500.8 cGy	7503.0 cGy	7509.8	7500.8	7503.0
test_CM	OFF	PTV70	33.8	V7000cGy[cc]				33 cc	33.1 cc	33.4 cc	33	33.1	33.4
test_CM	OFF	PTV66	146.9	D95%[cGy]				6507.1 cGy	6532.3 cGy	6554.2 cGy	6507.1	6532.3	6554.2
test_CM	OFF	PTV66	146.9	D98%[cGy]				6396.2 cGy	6441.4 cGy	6470.6 cGy	6396.2	6441.4	6470.6
test_CM	OFF	PTV66	146.9	D50%[cGy]				6846.7 cGy	6849.4 cGy	6843.5 cGy	6846.7	6849.4	6843.5
test_CM	OFF	PTV66	146.9	D2%[cGy]				7080.2 cGy	7083.7 cGy	7094.1 cGy	7080.2	7083.7	7094.1
test_CM	OFF	PTV66	146.9	V6600cGy[cc]				130.9 cc	132.9 cc	134.8 cc	130.9	132.9	134.8
test_CM	OFF	PTV60	111.2	D95%[cGy]				6041.2 cGy	6045.1 cGy	6058.0 cGy	6041.2	6045.1	6058.0
test_CM	OFF	PTV60	111.2	D98%[cGy]				5913.3 cGy	5956.7 cGy	5976.8 cGy	5913.3	5956.7	5976.8
test_CM	OFF	PTV60	111.2	D50%[cGy]				6740.9 cGy	6736.1 cGy	6729.8 cGy	6740.9	6736.1	6729.8
test_CM	OFF	PTV60	111.2	D2%[cGy]				7472.6 cGy	7429.8 cGy	7454.0 cGy	7472.6	7429.8	7454.0
test_CM	OFF	PTV60	111.2	V6000cGy[cc]				107 cc	107.6 cc	108.2 cc	107	107.6	108.2
test_CM	OFF	PTV54	900.3	D95%[cGy]				5381.6 cGy	5394.4 cGy	5413.8 cGy	5381.6	5394.4	5413.8
test_CM	OFF	PTV54	900.3	D98%[cGy]				5169.4 cGy	5191.8 cGy	5219.6 cGy	5169.4	5191.8	5219.6
test_CM	OFF	PTV54	900.3	D50%[cGy]				5969.8 cGy	5957.6 cGy	5942.6 cGy	5969.8	5957.6	5942.6
test_CM	OFF	PTV54	900.3	D2%[cGy]				7287.6 cGy	7237.3 cGy	7257.7 cGy	7287.6	7237.3	7257.7
test_CM	OFF	PTV54	900.3	V5400cGy[cc]				851 cc	853.9 cc	858.7 cc	851	853.9	858.7
test_CM	OFF	Body	9853.1	V7000cGy[cc]				58.5 cc	59.9 cc	57.5 cc	58.5	59.9	57.5
test_CM	OFF	Body	9853.1	V6600cGy[cc]				207 cc	206.4 cc	208.3 cc	207	206.4	208.3
test_CM	OFF	Body	9853.1	V6000cGy[cc]				440.3 cc	426.3 cc	415.7 cc	440.3	426.3	415.7
test_CM	OFF	Body	9853.1	V5400cGy[cc]				934.5 cc	937.4 cc	940.6 cc	934.5	937.4	940.6
test_CM	OFF	BrainStem	23.7	Max[cGy]				4336.4 cGy	4366.0 cGy	4404.0 cGy	4336.4	4366.0	4404.0
test_CM	OFF	BrainStem	23.7	Mean[cGy]				2823.5 cGy	2826.3 cGy	2791.3 cGy	2823.5	2826.3	2791.3
test_CM	OFF	SpinalCord	23.3	Max[cGy]				4361.9 cGy	4074.4 cGy	3997.2 cGy	4361.9	4074.4	3997.2
test_CM	OFF	SpinalCord	23.3	Mean[cGy]				2826.2 cGy	2702.7 cGy	2609.0 cGy	2826.2	2702.7	2609.0
test_CM	OFF	OpticNerve_L	0.3	Max[cGy]				4672.8 cGy	4611.2 cGy	4616.0 cGy	4672.8	4611.2	4616.0
test_CM	OFF	OpticNerve_R	0.3	Max[cGy]				4726.4 cGy	4756.6 cGy	4770.1 cGy	4726.4	4756.6	4770.1
test_CM	OFF	OpticChiasm	0.6	Max[cGy]				4342.6 cGy	4347.0 cGy	4263.6 cGy	4342.6	4347.0	4263.6
test_CM	OFF	Lens_L	0.2	Max[cGy]				323.1 cGy	310.9 cGy	291.6 cGy	323.1	310.9	291.6
test_CM	OFF	Lens_R	0.1	Max[cGy]				292.3 cGy	318.6 cGy	289.4 cGy	292.3	318.6	289.4
test_CM	OFF	Eye_L	8.3	Mean[cGy]				357.2 cGy	370.2 cGy	340.4 cGy	357.2	370.2	340.4
test_CM	OFF	Eye_R	8	Mean[cGy]				373.8 cGy	355.1 cGy	344.0 cGy	373.8	355.1	344.0
test_CM	OFF	Parotid_L	32.2	Mean[cGy]				2821.5 cGy	2771.9 cGy	2772.1 cGy	2821.5	2771.9	2772.1
test_CM	OFF	Parotid_L	32.2	V3000cGy[%]				0.33	0.304	0.303	33	30.4	30.3
test_CM	OFF	Parotid_R	28.7	Mean[cGy]				2953.6 cGy	2929.1 cGy	2907.8 cGy	2953.6	2929.1	2907.8
test_CM	OFF	Parotid_R	28.7	V3000cGy[%]				0.332	0.327	0.321	33.2	32.7	32.1
test_CM	OFF	Mandible	69.6	D2%[cGy]				6136.1 cGy	6171.8 cGy	6207.4 cGy	6136.1	6171.8	6207.4
test_CM	OFF	Larynx	39.4	Mean[cGy]				3525.5 cGy	3474.8 cGy	3391.7 cGy	3525.5	3474.8	3391.7
test_CM	OFF	OralCavity	143.5	Mean[cGy]				3561.0 cGy	3421.6 cGy	3449.6 cGy	3561.0	3421.6	3449.6
test_CM	OFF	Pituitary	0.2	Max[cGy]				5076.9 cGy	5231.3 cGy	5117.6 cGy	5076.9	5231.3	5117.6
test_CM	OFF	TMJ_L	0.4	Max[cGy]				2720.0 cGy	2522.6 cGy	2589.6 cGy	2720.0	2522.6	2589.6
test_CM	OFF	TMJ_R	0.5	Max[cGy]				2778.7 cGy	2872.8 cGy	2650.6 cGy	2778.7	2872.8	2650.6
test_CM	OFF	MiddleEar_L	3.1	Mean[cGy]				4359.4 cGy	4331.2 cGy	4229.0 cGy	4359.4	4331.2	4229.0
test_CM	OFF	MiddleEar_R	3.9	Mean[cGy]				4522.3 cGy	4517.7 cGy	4482.5 cGy	4522.3	4517.7	4482.5

## Sheet: 8
DVH Metrics Table
Course ID	PlanSetup ID	Structure ID	Volume (cc)	DVH Objective	Goal	Must	Priority	OFF	ON	Extended	OFF	ON	Extended
		PTV70		CI							0.774508	0.828892	0.83905
		PTV70		HI							0.0547	0.0497188	0.0542273
		PTV66		HI							0.0698559	0.0653609	0.0596402
		PTV60		HI							0.194346	0.192563	0.202523
		PTV54		CI							0.856244	0.858925	0.854468
		PTV54		HI							0.357761	0.355017	0.361921
test_CM	OFF	PTV70	36.4	D95%[cGy]				7029.2 cGy	7028.7 cGy	7031.7 cGy	7029.2	7028.7	7031.7
test_CM	OFF	PTV70	36.4	D98%[cGy]				6979.5 cGy	6979.1 cGy	6975.8 cGy	6979.5	6979.1	6975.8
test_CM	OFF	PTV70	36.4	D50%[cGy]				7221.2 cGy	7184.4 cGy	7206.7 cGy	7221.2	7184.4	7206.7
test_CM	OFF	PTV70	36.4	D2%[cGy]				7374.5 cGy	7336.3 cGy	7366.6 cGy	7374.5	7336.3	7366.6
test_CM	OFF	PTV70	36.4	V7000cGy[cc]				35.3 cc	35.3 cc	35.3 cc	35.3	35.3	35.3
test_CM	OFF	PTV66	24.2	D95%[cGy]				6638.7 cGy	6600.6 cGy	6600.2 cGy	6638.7	6600.6	6600.2
test_CM	OFF	PTV66	24.2	D98%[cGy]				6583.8 cGy	6555.4 cGy	6551.5 cGy	6583.8	6555.4	6551.5
test_CM	OFF	PTV66	24.2	D50%[cGy]				6858.4 cGy	6785.4 cGy	6770.6 cGy	6858.4	6785.4	6770.6
test_CM	OFF	PTV66	24.2	D2%[cGy]				7062.9 cGy	6998.9 cGy	6955.3 cGy	7062.9	6998.9	6955.3
test_CM	OFF	PTV66	24.2	V6600cGy[cc]				23.6 cc	23 cc	23 cc	23.6	23	23
test_CM	OFF	PTV60	100.6	D95%[cGy]				6098.0 cGy	6065.1 cGy	6033.2 cGy	6098.0	6065.1	6033.2
test_CM	OFF	PTV60	100.6	D98%[cGy]				6015.4 cGy	5993.0 cGy	5958.3 cGy	6015.4	5993.0	5958.3
test_CM	OFF	PTV60	100.6	D50%[cGy]				6827.5 cGy	6809.2 cGy	6809.1 cGy	6827.5	6809.2	6809.1
test_CM	OFF	PTV60	100.6	D2%[cGy]				7342.3 cGy	7304.2 cGy	7337.3 cGy	7342.3	7304.2	7337.3
test_CM	OFF	PTV60	100.6	V6000cGy[cc]				99 cc	98.4 cc	97.2 cc	99	98.4	97.2
test_CM	OFF	PTV54	702.1	D95%[cGy]				5304.0 cGy	5300.7 cGy	5292.7 cGy	5304.0	5300.7	5292.7
test_CM	OFF	PTV54	702.1	D98%[cGy]				5148.2 cGy	5148.1 cGy	5139.5 cGy	5148.2	5148.1	5139.5
test_CM	OFF	PTV54	702.1	D50%[cGy]				5869.0 cGy	5804.8 cGy	5792.7 cGy	5869.0	5804.8	5792.7
test_CM	OFF	PTV54	702.1	D2%[cGy]				7247.9 cGy	7208.9 cGy	7236.0 cGy	7247.9	7208.9	7236.0
test_CM	OFF	PTV54	702.1	V5400cGy[cc]				642.7 cc	639.9 cc	635.6 cc	642.7	639.9	635.6
test_CM	OFF	Body	11685.4	V7000cGy[cc]				44.2 cc	41.3 cc	40.8 cc	44.2	41.3	40.8
test_CM	OFF	Body	11685.4	V6600cGy[cc]				103.5 cc	96.1 cc	95.4 cc	103.5	96.1	95.4
test_CM	OFF	Body	11685.4	V6000cGy[cc]				263.7 cc	224.8 cc	220.6 cc	263.7	224.8	220.6
test_CM	OFF	Body	11685.4	V5400cGy[cc]				687.1 cc	679 cc	673.4 cc	687.1	679	673.4
test_CM	OFF	BrainStem	23.3	Max[cGy]				4577.1 cGy	4607.0 cGy	4673.8 cGy	4577.1	4607.0	4673.8
test_CM	OFF	BrainStem	23.3	Mean[cGy]				1944.9 cGy	1912.0 cGy	1901.7 cGy	1944.9	1912.0	1901.7
test_CM	OFF	SpinalCord	26.7	Max[cGy]				3878.1 cGy	3793.5 cGy	3746.7 cGy	3878.1	3793.5	3746.7
test_CM	OFF	SpinalCord	26.7	Mean[cGy]				2507.6 cGy	2359.8 cGy	2356.3 cGy	2507.6	2359.8	2356.3
test_CM	OFF	OpticNerve_L	0.2	Max[cGy]				2693.7 cGy	2721.8 cGy	2759.1 cGy	2693.7	2721.8	2759.1
test_CM	OFF	OpticNerve_R	0.4	Max[cGy]				4551.2 cGy	4476.5 cGy	4491.8 cGy	4551.2	4476.5	4491.8
test_CM	OFF	OpticChiasm	0.1	Max[cGy]				2138.8 cGy	2112.2 cGy	2043.0 cGy	2138.8	2112.2	2043.0
test_CM	OFF	Lens_L	0.1	Max[cGy]				313.1 cGy	317.1 cGy	305.8 cGy	313.1	317.1	305.8
test_CM	OFF	Lens_R	0.2	Max[cGy]				360.2 cGy	346.8 cGy	355.0 cGy	360.2	346.8	355.0
test_CM	OFF	Eye_L	8	Mean[cGy]				462.8 cGy	471.2 cGy	464.4 cGy	462.8	471.2	464.4
test_CM	OFF	Eye_R	8.3	Mean[cGy]				599.2 cGy	570.5 cGy	597.4 cGy	599.2	570.5	597.4
test_CM	OFF	Parotid_L	42.3	Mean[cGy]				2231.5 cGy	2208.2 cGy	2182.3 cGy	2231.5	2208.2	2182.3
test_CM	OFF	Parotid_L	42.3	V3000cGy[%]				0.248	0.237	0.24	24.8	23.7	24
test_CM	OFF	Parotid_R	38.9	Mean[cGy]				2122.6 cGy	2083.2 cGy	2064.3 cGy	2122.6	2083.2	2064.3
test_CM	OFF	Parotid_R	38.9	V3000cGy[%]				0.205	0.217	0.215	20.5	21.7	21.5
test_CM	OFF	Mandible	64.9	D2%[cGy]				4903.2 cGy	4816.6 cGy	4740.7 cGy	4903.2	4816.6	4740.7
test_CM	OFF	Larynx	53	Mean[cGy]				3200.7 cGy	3112.9 cGy	3121.3 cGy	3200.7	3112.9	3121.3
test_CM	OFF	OralCavity	144.1	Mean[cGy]				2851.4 cGy	2768.6 cGy	2707.8 cGy	2851.4	2768.6	2707.8
test_CM	OFF	Pituitary	0.3	Max[cGy]				5986.0 cGy	6004.2 cGy	5941.9 cGy	5986.0	6004.2	5941.9
test_CM	OFF	TMJ_L	2.5	Max[cGy]				3376.0 cGy	3618.3 cGy	3646.4 cGy	3376.0	3618.3	3646.4
test_CM	OFF	TMJ_R	2.5	Max[cGy]				5821.8 cGy	5711.4 cGy	5708.1 cGy	5821.8	5711.4	5708.1
											#VALUE!	#VALUE!	#VALUE!
											#VALUE!	#VALUE!	#VALUE!

## Sheet: 9
DVH Metrics Table
Course ID	PlanSetup ID	Structure ID	Volume (cc)	DVH Objective	Goal	Must	Priority	OFF	ON	Extended	OFF	ON	Extended
		PTV70		CI							0.670659	0.729154	0.744586
		PTV70		HI							0.105703	0.10281	0.102084
		PTV66		HI							0.0872655	0.0753126	0.0722979
		PTV60		HI							0.233569	0.22964	0.22717
		PTV54		CI							0.839467	0.851999	0.857566
		PTV54		HI							0.402513	0.395518	0.391346
test_CM	OFF	PTV70	93.6	D95%[cGy]				7000.0 cGy	6999.9 cGy	7000.0 cGy	7000.0	6999.9	7000.0
test_CM	OFF	PTV70	93.6	D98%[cGy]				6846.1 cGy	6840.4 cGy	6832.3 cGy	6846.1	6840.4	6832.3
test_CM	OFF	PTV70	93.6	D50%[cGy]				7412.3 cGy	7387.4 cGy	7379.2 cGy	7412.3	7387.4	7379.2
test_CM	OFF	PTV70	93.6	D2%[cGy]				7629.6 cGy	7599.9 cGy	7585.6 cGy	7629.6	7599.9	7585.6
test_CM	OFF	PTV70	93.6	V7000cGy[cc]				88.9 cc	88.9 cc	88.9 cc	88.9	88.9	88.9
test_CM	OFF	PTV66	48.3	D95%[cGy]				6659.9 cGy	6667.9 cGy	6668.0 cGy	6659.9	6667.9	6668.0
test_CM	OFF	PTV66	48.3	D98%[cGy]				6589.9 cGy	6602.1 cGy	6605.8 cGy	6589.9	6602.1	6605.8
test_CM	OFF	PTV66	48.3	D50%[cGy]				6908.8 cGy	6878.0 cGy	6877.1 cGy	6908.8	6878.0	6877.1
test_CM	OFF	PTV66	48.3	D2%[cGy]				7192.8 cGy	7120.1 cGy	7103.0 cGy	7192.8	7120.1	7103.0
test_CM	OFF	PTV66	48.3	V6600cGy[cc]				47.2 cc	47.4 cc	47.4 cc	47.2	47.4	47.4
test_CM	OFF	PTV60	352	D95%[cGy]				6141.1 cGy	6139.7 cGy	6139.7 cGy	6141.1	6139.7	6139.7
test_CM	OFF	PTV60	352	D98%[cGy]				5986.2 cGy	5994.5 cGy	6002.1 cGy	5986.2	5994.5	6002.1
test_CM	OFF	PTV60	352	D50%[cGy]				6814.7 cGy	6782.8 cGy	6775.1 cGy	6814.7	6782.8	6775.1
test_CM	OFF	PTV60	352	D2%[cGy]				7577.9 cGy	7552.1 cGy	7541.2 cGy	7577.9	7552.1	7541.2
test_CM	OFF	PTV60	352	V6000cGy[cc]				344.4 cc	344.7 cc	345.1 cc	344.4	344.7	345.1
test_CM	OFF	PTV54	967.4	D95%[cGy]				5291.8 cGy	5315.7 cGy	5328.4 cGy	5291.8	5315.7	5328.4
test_CM	OFF	PTV54	967.4	D98%[cGy]				5121.4 cGy	5143.7 cGy	5170.1 cGy	5121.4	5143.7	5170.1
test_CM	OFF	PTV54	967.4	D50%[cGy]				5952.1 cGy	5939.3 cGy	5914.2 cGy	5952.1	5939.3	5914.2
test_CM	OFF	PTV54	967.4	D2%[cGy]				7517.2 cGy	7492.8 cGy	7484.6 cGy	7517.2	7492.8	7484.6
test_CM	OFF	PTV54	967.4	V5400cGy[cc]				887.5 cc	894.1 cc	896.6 cc	887.5	894.1	896.6
test_CM	OFF	Body	13824.7	V7000cGy[cc]				125.9 cc	115.8 cc	113.4 cc	125.9	115.8	113.4
test_CM	OFF	Body	13824.7	V6600cGy[cc]				247.8 cc	237.6 cc	233 cc	247.8	237.6	233
test_CM	OFF	Body	13824.7	V6000cGy[cc]				469.2 cc	460.2 cc	445.3 cc	469.2	460.2	445.3
test_CM	OFF	Body	13824.7	V5400cGy[cc]				969.9 cc	969.9 cc	969 cc	969.9	969.9	969
test_CM	OFF	BrainStem	22.8	Max[cGy]				5349.4 cGy	5175.0 cGy	5168.9 cGy	5349.4	5175.0	5168.9
test_CM	OFF	BrainStem	22.8	Mean[cGy]				3440.5 cGy	3509.9 cGy	3436.7 cGy	3440.5	3509.9	3436.7
test_CM	OFF	SpinalCord	30	Max[cGy]				3992.5 cGy	4014.9 cGy	3846.9 cGy	3992.5	4014.9	3846.9
test_CM	OFF	SpinalCord	30	Mean[cGy]				2310.8 cGy	2249.5 cGy	2225.4 cGy	2310.8	2249.5	2225.4
test_CM	OFF	OpticNerve_L	0.4	Max[cGy]				4964.7 cGy	4870.8 cGy	4808.2 cGy	4964.7	4870.8	4808.2
test_CM	OFF	OpticNerve_R	0.8	Max[cGy]				6985.9 cGy	7072.8 cGy	6916.8 cGy	6985.9	7072.8	6916.8
test_CM	OFF	OpticChiasm	0.3	Max[cGy]				5559.9 cGy	5601.1 cGy	5520.3 cGy	5559.9	5601.1	5520.3
test_CM	OFF	Lens_L	0.2	Max[cGy]				466.8 cGy	464.5 cGy	437.7 cGy	466.8	464.5	437.7
test_CM	OFF	Lens_R	0.2	Max[cGy]				482.5 cGy	455.8 cGy	461.5 cGy	482.5	455.8	461.5
test_CM	OFF	Eye_L	9	Mean[cGy]				1174.6 cGy	1114.4 cGy	1122.9 cGy	1174.6	1114.4	1122.9
test_CM	OFF	Eye_R	9	Mean[cGy]				1325.7 cGy	1243.1 cGy	1215.3 cGy	1325.7	1243.1	1215.3
test_CM	OFF	Parotid_L	25.4	Mean[cGy]				2664.0 cGy	2643.4 cGy	2550.6 cGy	2664.0	2643.4	2550.6
test_CM	OFF	Parotid_L	25.4	V3000cGy[%]				0.33	0.327	0.317	33	32.7	31.7
test_CM	OFF	Parotid_R	26.8	Mean[cGy]				2140.0 cGy	2056.8 cGy	2038.9 cGy	2140.0	2056.8	2038.9
test_CM	OFF	Parotid_R	26.8	V3000cGy[%]				0.214	0.203	0.228	21.4	20.3	22.8
test_CM	OFF	Mandible	72.1	D2%[cGy]				5909.5 cGy	5863.2 cGy	5856.1 cGy	5909.5	5863.2	5856.1
test_CM	OFF	Larynx	29.9	Mean[cGy]				3698.2 cGy	3666.6 cGy	3567.5 cGy	3698.2	3666.6	3567.5
test_CM	OFF	OralCavity	125.5	Mean[cGy]				3472.3 cGy	3375.7 cGy	3303.6 cGy	3472.3	3375.7	3303.6
test_CM	OFF	Pituitary	0.1	Max[cGy]				6422.4 cGy	6349.1 cGy	6330.2 cGy	6422.4	6349.1	6330.2
test_CM	OFF	TMJ_L	1.7	Max[cGy]				4625.4 cGy	4734.2 cGy	4631.4 cGy	4625.4	4734.2	4631.4
test_CM	OFF	TMJ_R	1.4	Max[cGy]				5166.8 cGy	5304.3 cGy	5207.2 cGy	5166.8	5304.3	5207.2
test_CM	OFF	MiddleEar_L	1.1	Mean[cGy]				3460.6 cGy	3462.7 cGy	3434.2 cGy	3460.6	3462.7	3434.2
test_CM	OFF	MiddleEar_R	0.8	Mean[cGy]				3463.3 cGy	3456.1 cGy	3431.4 cGy	3463.3	3456.1	3431.4

## Sheet: 10
DVH Metrics Table
Course ID	PlanSetup ID	Structure ID	Volume (cc)	DVH Objective	Goal	Must	Priority	OFF	ON	Extended	OFF	ON	Extended
		PTV70		CI							0.58439	0.619705	0.576567
		PTV70		HI							0.0662116	0.0662454	0.0669685
		PTV66		HI							0.0885737	0.0814639	0.0834116
		PTV60		HI							0.212198	0.216412	0.211741
		PTV54		CI							0.837202	0.840108	0.846256
		PTV54		HI							0.36857	0.366058	0.36365
test_CM	OFF	PTV70	46.6	D95%[cGy]				7016.1 cGy	7015.5 cGy	7015.1 cGy	7016.1	7015.5	7015.1
test_CM	OFF	PTV70	46.6	D98%[cGy]				6956.8 cGy	6960.4 cGy	6960.1 cGy	6956.8	6960.4	6960.1
test_CM	OFF	PTV70	46.6	D50%[cGy]				7281.2 cGy	7263.9 cGy	7266.1 cGy	7281.2	7263.9	7266.1
test_CM	OFF	PTV70	46.6	D2%[cGy]				7438.9 cGy	7441.6 cGy	7446.7 cGy	7438.9	7441.6	7446.7
test_CM	OFF	PTV70	46.6	V7000cGy[cc]				44.8 cc	44.8 cc	44.8 cc	44.8	44.8	44.8
test_CM	OFF	PTV66	82.5	D95%[cGy]				6644.6 cGy	6640.8 cGy	6656.9 cGy	6644.6	6640.8	6656.9
test_CM	OFF	PTV66	82.5	D98%[cGy]				6581.8 cGy	6579.5 cGy	6591.4 cGy	6581.8	6579.5	6591.4
test_CM	OFF	PTV66	82.5	D50%[cGy]				6901.6 cGy	6891.4 cGy	6917.5 cGy	6901.6	6891.4	6917.5
test_CM	OFF	PTV66	82.5	D2%[cGy]				7193.1 cGy	7140.9 cGy	7168.4 cGy	7193.1	7140.9	7168.4
test_CM	OFF	PTV66	82.5	V6600cGy[cc]				80.3 cc	80.2 cc	80.6 cc	80.3	80.2	80.6
test_CM	OFF	PTV60	204.2	D95%[cGy]				6089.7 cGy	6077.7 cGy	6082.1 cGy	6089.7	6077.7	6082.1
test_CM	OFF	PTV60	204.2	D98%[cGy]				5954.6 cGy	5930.5 cGy	5956.9 cGy	5954.6	5930.5	5956.9
test_CM	OFF	PTV60	204.2	D50%[cGy]				6796.0 cGy	6777.8 cGy	6786.6 cGy	6796.0	6777.8	6786.6
test_CM	OFF	PTV60	204.2	D2%[cGy]				7396.7 cGy	7397.3 cGy	7393.9 cGy	7396.7	7397.3	7393.9
test_CM	OFF	PTV60	204.2	V6000cGy[cc]				198.6 cc	197.9 cc	198.6 cc	198.6	197.9	198.6
test_CM	OFF	PTV54	849.9	D95%[cGy]				5276.2 cGy	5280.1 cGy	5290.9 cGy	5276.2	5280.1	5290.9
test_CM	OFF	PTV54	849.9	D98%[cGy]				5114.1 cGy	5119.2 cGy	5134.6 cGy	5114.1	5119.2	5134.6
test_CM	OFF	PTV54	849.9	D50%[cGy]				5985.3 cGy	5977.2 cGy	5968.1 cGy	5985.3	5977.2	5968.1
test_CM	OFF	PTV54	849.9	D2%[cGy]				7320.1 cGy	7307.2 cGy	7304.9 cGy	7320.1	7307.2	7304.9
test_CM	OFF	PTV54	849.9	V5400cGy[cc]				772 cc	774.4 cc	775.7 cc	772	774.4	775.7
test_CM	OFF	Body	12145.9	V7000cGy[cc]				73.7 cc	69.5 cc	74.7 cc	73.7	69.5	74.7
test_CM	OFF	Body	12145.9	V6600cGy[cc]				189 cc	188.3 cc	189.3 cc	189	188.3	189.3
test_CM	OFF	Body	12145.9	V6000cGy[cc]				421.3 cc	415.9 cc	409 cc	421.3	415.9	409
test_CM	OFF	Body	12145.9	V5400cGy[cc]				837.6 cc	839.9 cc	836.6 cc	837.6	839.9	836.6
test_CM	OFF	BrainStem	26.5	Max[cGy]				4354.2 cGy	4354.7 cGy	4299.6 cGy	4354.2	4354.7	4299.6
test_CM	OFF	BrainStem	26.5	Mean[cGy]				2400.7 cGy	2443.7 cGy	2393.0 cGy	2400.7	2443.7	2393.0
test_CM	OFF	SpinalCord	29	Max[cGy]				3708.0 cGy	3790.0 cGy	3609.8 cGy	3708.0	3790.0	3609.8
test_CM	OFF	SpinalCord	29	Mean[cGy]				2353.1 cGy	2394.5 cGy	2331.5 cGy	2353.1	2394.5	2331.5
test_CM	OFF	OpticNerve_L	0.4	Max[cGy]				804.8 cGy	840.0 cGy	798.9 cGy	804.8	840.0	798.9
test_CM	OFF	OpticNerve_R	0.4	Max[cGy]				796.0 cGy	781.0 cGy	811.6 cGy	796.0	781.0	811.6
test_CM	OFF	OpticChiasm	0.9	Max[cGy]				2613.2 cGy	2580.7 cGy	2476.8 cGy	2613.2	2580.7	2476.8
test_CM	OFF	Lens_L	0.2	Max[cGy]				180.4 cGy	171.9 cGy	168.7 cGy	180.4	171.9	168.7
test_CM	OFF	Lens_R	0.1	Max[cGy]				175.6 cGy	169.4 cGy	168.5 cGy	175.6	169.4	168.5
test_CM	OFF	Eye_L	8.3	Mean[cGy]				191.5 cGy	189.7 cGy	186.5 cGy	191.5	189.7	186.5
test_CM	OFF	Eye_R	8.5	Mean[cGy]				207.2 cGy	203.6 cGy	201.1 cGy	207.2	203.6	201.1
test_CM	OFF	Parotid_L	40.8	Mean[cGy]				2698.8 cGy	2677.9 cGy	2624.1 cGy	2698.8	2677.9	2624.1
test_CM	OFF	Parotid_L	40.8	V3000cGy[%]				0.335	0.347	0.33	33.5	34.7	33
test_CM	OFF	Parotid_R	39	Mean[cGy]				2173.4 cGy	2175.8 cGy	2093.4 cGy	2173.4	2175.8	2093.4
test_CM	OFF	Parotid_R	39	V3000cGy[%]				0.237	0.254	0.24	23.7	25.4	24
test_CM	OFF	Mandible	89.9	D2%[cGy]				5602.5 cGy	5531.7 cGy	5488.6 cGy	5602.5	5531.7	5488.6
test_CM	OFF	Larynx	28.3	Mean[cGy]				3476.1 cGy	3360.7 cGy	3315.7 cGy	3476.1	3360.7	3315.7
test_CM	OFF	OralCavity	149.2	Mean[cGy]				3064.8 cGy	3079.9 cGy	2992.2 cGy	3064.8	3079.9	2992.2
test_CM	OFF	Pituitary	0.2	Max[cGy]				4771.5 cGy	4643.5 cGy	4745.6 cGy	4771.5	4643.5	4745.6
test_CM	OFF	TMJ_L	1	Max[cGy]				4448.5 cGy	4410.5 cGy	4444.7 cGy	4448.5	4410.5	4444.7
test_CM	OFF	TMJ_R	0.8	Max[cGy]				5235.4 cGy	5286.8 cGy	5184.7 cGy	5235.4	5286.8	5184.7
											#VALUE!	#VALUE!	#VALUE!
											#VALUE!	#VALUE!	#VALUE!

[truncated: 11 more sheets: 11, 12, 13, 14, 15, 16, 17, 18, 19, 20, 21]
