# Supplementary material for: Dosimetric comparison and evaluation of different convergence modes in nasopharyngeal carcinoma using VMAT treatment deliveries
Source: PeerJ. 2024 Dec 23;12:e18773. doi: 10.7717/peerj.18773 (PMC11670755; doi:10.7717/peerj.18773)
Supplement: Supplemental Information 2 [file peerj-12-18773-s002.xlsx]

## Sheet: MCS
MCS	OFF	ON	Extended
1	0.19354	0.189862	0.19542
2	0.135808	0.134302	0.132002
3	0.182847	0.179682	0.17752
4	0.199474	0.178	0.165767
5	0.171162	0.168131	0.174082
6	0.186595	0.181121	0.18817
7	0.14141	0.137748	0.139332
8	0.175138	0.16757	0.166894
9	0.194572	0.19257	0.193466
10	0.176923	0.173637	0.17647
11	0.180784	0.175449	0.181152
12	0.194726	0.189611	0.186642
13	0.18515	0.182496	0.181419
14	0.174015	0.176269	0.173099
15	0.17139	0.172243	0.174824
16	0.161894	0.159758	0.157672
17	0.166558	0.163025	0.161208
18	0.14478	0.142074	0.143913
19	0.144167	0.141843	0.142305
20	0.211697	0.207221	0.206755
21	0.140886	0.137484	0.137829

## Sheet: ALPO
ALPO	OFF	ON	Extended
1	33.5959	33.3777	33.5133
2	24.5359	23.9343	23.6285
3	33.1775	32.6283	31.6298
4	31.7696	28.7406	26.5714
5	26.6126	26.503	26.5937
6	30.0629	29.1497	27.2543
7	25.6981	25.1608	25.3728
8	30.6374	30.0859	31.3551
9	35.0414	34.8619	34.7763
10	30.7731	31.6203	31.5802
11	28.4088	28.1382	28.0619
12	31.408	31.5404	31.256
13	32.412	30.9951	32.0122
14	28.4067	27.3289	28.5016
15	27.1525	26.1057	25.9075
16	24.6249	24.3774	24.1819
17	27.9126	28.2235	27.5739
18	25.8174	25.038	25.0392
19	22.4473	22.0872	22.0035
20	38.9152	37.9077	37.1709
21	22.1932	22.1375	22.1763

## Sheet: ALPO_MU
ALPO_MU	OFF	ON	Extended
1	32.9423	32.723	32.9876
2	23.5341	23.4547	22.9698
3	64.0546	60.1032	58.2883
4	31.1948	28.177	25.8469
5	26.2396	25.6896	25.9414
6	28.2089	27.6613	27.0909
7	24.4115	24.2003	24.0344
8	29.5079	28.6396	28.6415
9	33.9994	33.7325	33.9763
10	30.0799	29.9679	29.6827
11	27.8187	27.4117	27.4862
12	31.1728	31.0407	30.6656
13	30.9507	30.4654	30.4251
14	27.7782	27.2625	26.9374
15	25.7705	25.5174	25.3676
16	23.8745	23.5775	23.4859
17	27.5898	27.0997	26.7444
18	24.9509	24.5541	24.6466
19	22.2426	22.0427	21.7578
20	37.6945	36.7914	35.9133
21	21.6042	21.3684	21.3954

## Sheet: MU
MU	OFF	ON	Extended
1	659.1	656.3	639.6
2	943.1	943.1	945
3	774.4	769.7	781.8
4	508.5	555.1	602.2
5	771.4	771.1	760
6	895.8	913.2	914.2
7	1010.1	1008.8	1011
8	774.8	773.2	768.4
9	731.2	728.3	712.7
10	802	797	804.1
11	800.8	798.4	796.2
12	748.4	746.2	745
13	736.4	734.6	732.3
14	761.5	760.9	761.2
15	775.9	775.1	772
16	750.7	750.8	750
17	793.5	790.9	792.2
18	904.8	905.7	899.8
19	867.2	867.8	868.5
20	738.4	750.1	758.4
21	973.1	973.3	978.4

## Sheet: Pass_Rate(3mm3%)
3mm3%	OFF	ON	Extended
1	100	100	100
2	99.9	99.9	100
3	100	100	100
4	100	100	100
5	100	100	100
6	100	100	100
7	99.9	100	99.9
8	99.9	100	100
9	100	100	100
10	100	100	100
11	100	100	100
12	100	99.9	99.9
13	100	100	100
14	100	100	100
15	100	100	100
16	99.9	99.9	100
17	100	100	100
18	100	100	100
19	100	99.8	100
20	100	100	100
21	99.9	99.9	99.9

## Sheet: Pass_Rate(2mm2%)
2mm2%	OFF	ON	Extended
1	99.7	99.7	99.8
2	99.1	99.2	99.5
3	99.7	99.7	99.7
4	99.9	99.8	99.7
5	99.8	99.7	99.9
6	99.6	99.7	99.6
7	99.4	99.4	99.4
8	99.4	99.5	99.6
9	99.7	99.6	99.7
10	99.6	99.7	99.6
11	99.6	99.6	99.6
12	99.5	99.1	99.4
13	99.7	99.8	99.7
14	99.6	99.7	99.6
15	99.7	99.7	99.8
16	99.4	99.5	99.5
17	99.7	99.6	99.5
18	99.5	99.8	99.7
19	99.3	99.1	99.2
20	99.6	99.5	99.7
21	99	99	99

## Sheet: Time(Total)
Time(min)	OFF	ON	Extended
1	10.95	25.9167	117.933
2	14.9667	30.8667	107.783
3	15.7	38.8	191.033
4	8.65	19.9167	80.7167
5	16.3667	48.7	230.767
6	18.95	37.45	144.083
7	15.9	36.45	129.767
8	13.4	35.7167	111.55
9	17.8667	52.6333	271.483
10	16.15	40.2833	156.233
11	11.5167	32.4833	117.317
12	11	29.2167	89.7333
13	11.2167	33.2667	98.6333
14	16.8833	43.35	188.233
15	18.8833	48.3667	205.683
16	11.65	29.15	134.033
17	19.6167	47.6833	162.95
18	16.1333	35.6	140.717
19	9.8	21.9333	88.2833
20	12.65	39.3333	178.433
21	13.1333	27.4333	113.033

## Sheet: Time(MR1)
Time(min)	OFF	ON	Extended
1	5.1	11	26.2833
2	6.35	13.7	29.8333
3	7.45	18.1333	40.1833
4	3.86667	8.88333	22.9833
5	7.58333	21.9333	33.05
6	8.11667	15.2833	38.2833
7	7.08333	15.7333	35.6333
8	6.21667	15.5333	30.5167
9	8.45	22.2	59.9
10	7.35	17.6333	38.9667
11	5.61667	14.6833	35.4833
12	5.06667	13.3667	26.8833
13	5.41667	15.1167	30.0333
14	7.46667	18.8167	42.9
15	8.6	21.0333	43.8
16	5.23333	12.6667	29.4
17	7.85	20.3667	41.25
18	6.63333	14.6333	35.4667
19	4.25	9.7	21.3167
20	6.13333	18.0667	51.8167
21	5.35	11.9167	25.6333

## Sheet: Time(MR2)
Time(min)	OFF	ON	Extended
1	1.78333	6.83333	40.0667
2	2.86667	6.91667	18.2
3	2.83333	7.96667	27.2167
4	1.43333	4.08333	16.2333
5	3.31667	12.4167	38.1833
6	3.95	9.83333	31.75
7	3.13333	9.26667	26.3
8	2.45	9.35	27.9167
9	3.7	14.55	62.5833
10	2.58333	9.13333	27.2667
11	1.6	7.43333	26.1167
12	1.53333	6.3	22.9833
13	1.41667	6.75	21.85
14	3.33333	11.2333	32.9333
15	3.75	12.5167	43.7167
16	2.21667	7.2	34.1833
17	4.13333	12.7833	46.8667
18	3.7	9.25	33.5167
19	1.88333	5.31667	15.1333
20	2.01667	9.91667	55.65
21	2.96667	7.01667	19.6167

## Sheet: Time(MR3)
Time(min)	OFF	ON	Extended
1	1.43333	3.98333	32.65
2	2.05	4.85	33.5833
3	1.8	6.3	88.1
4	1.16667	3.4	27.2333
5	2.11667	7.45	119
6	2.56667	5.83333	37.7167
7	1.85	5.3	33.5167
8	1.5	5.58333	28.75
9	2.03333	9.08333	110.5
10	2.01667	7.1	53.4167
11	1.35	4.9	30.1167
12	1.3	4.46667	20
13	1.35	5.66667	21.9667
14	2.06667	6.83333	66.1833
15	2.48333	8.2	74.7667
16	1.33333	4.06667	45.65
17	2.28333	7.58333	41.6167
18	1.9	5.78333	40.5667
19	0.966667	3.23333	21.1333
20	1.55	6.43333	49.8833
21	1.48333	4.08333	33.65

[truncated: 1 more sheets: Time(MR4)]
